# Supplementary material for: Characterization of Free and Bound Phenolic Acids and Flavonoid Aglycones in Rosa rugosa Thunb. Leaves and Achenes Using LC–ESI–MS/MS–MRM Methods
Source: MDPI journal article supplement (doi:10.3390/molecules25081804), 2020-04-15

## SUPPLEMENTARY MATERIAL

# Characterization of Free and Bound Phenolic Acids and Flavonoid Aglycones in *Rosa rugosa* Thunb. Leaves and Achenes Using LC–ESI–MS/MS–MRM Methods

Marta Olech\*, Wioleta Pietrzak, Renata Nowak

Chair and Department of Pharmaceutical Botany, Medical University, 1 Chodźki Street, 20-093 Lublin, Poland

\* Corresponding author. Tel.: +48 81 448 70 63; fax : +48 81 448 70 60;

E-mail address: [marta.olech@umlub.pl](mailto:marta.olech@umlub.pl)

**Keywords:** liquid chromatography mass spectrometry; validation; *Rosaceae*; rose leaves; rose true fruit; flavonoid aglycones; phenolic acids

**Table S1.** The optimized LC-MS parameters for qualitative analysis of phenolic acids.

| Compound                                                            | Retention<br>time [min] | Q1<br>[m/z] | Q3<br>[m/z] | DP <sup>a</sup><br>[V] | EP <sup>b</sup><br>[V] | CEP <sup>c</sup><br>[V] | CE <sup>d</sup><br>[eV] | CXP <sup>e</sup><br>[V] |
|---------------------------------------------------------------------|-------------------------|-------------|-------------|------------------------|------------------------|-------------------------|-------------------------|-------------------------|
| Gallic acid                                                         | 5.14                    | 168.7       | 78.9        | -35                    | -3                     | -12                     | -36                     | 0                       |
|                                                                     |                         |             | 124.9*      | -35                    | -3                     | -12                     | -14                     | 0                       |
| 5- <i>O</i> -caffeoylquinic acid                                    | 5.19                    | 352.9       | 190.8*      | -35                    | -4.5                   | -16                     | -24                     | -2                      |
|                                                                     |                         |             | 84.9        | -35                    | -4.5                   | -16                     | -60                     | 0                       |
| Homogentisic acid                                                   | 5.27                    | 166.8       | 123         | -25                    | -5                     | -12                     | -12                     | 0                       |
|                                                                     |                         |             | 108*        | -25                    | -5                     | -12                     | -36                     | 0                       |
| $\alpha$ -resorcylic acid                                           | 5.47                    | 152.8       | 109         | -30                    | -10.5                  | -10                     | -12                     | 0                       |
|                                                                     |                         |             | 64.9*       | -30                    | -10.5                  | -10                     | -20                     | 0                       |
| Protocatechuic acid                                                 | 5.91                    | 152.9       | 80.9        | -55                    | -1                     | -10                     | -26                     | 0                       |
|                                                                     |                         |             | 107.8*      | -55                    | -1                     | -10                     | -38                     | 0                       |
| <i>trans</i> -Caffeic acid                                          | 6.92                    | 178.7       | 88.9        | -30                    | -6.5                   | -12                     | -46                     | 0                       |
|                                                                     |                         |             | 134.9*      | -30                    | -6.5                   | -12                     | -16                     | 0                       |
| <i>cis</i> -Caffeic acid                                            | 7.10                    | 178.7       | 88.9        | -30                    | -6.5                   | -12                     | -46                     | 0                       |
|                                                                     |                         |             | 134.9       | -30                    | -6.5                   | -12                     | -16                     | 0                       |
| Syringic acid                                                       | 7.19                    | 196.9       | 122.8       | -30                    | -9                     | -12                     | -24                     | 0                       |
|                                                                     |                         |             | 181.9*      | -30                    | -9                     | -12                     | -12                     | -2                      |
| 4-hydroxybenzoic acid                                               | 7.32                    | 136.8       | 92.9*       | -30                    | -7                     | -10                     | -18                     | 0                       |
| Vanilic acid                                                        | 7.45                    | 166.8       | 107.9*      | -35                    | -4                     | -12                     | -18                     | 0                       |
|                                                                     |                         |             | 123         | -35                    | -4                     | -12                     | -12                     | 0                       |
| Gentisic acid                                                       | 7.78                    | 152.9       | 80          | -70                    | -4                     | -16                     | -110                    | 0                       |
|                                                                     |                         |             | 107.9*      | -70                    | -4                     | -16                     | -52                     | 0                       |
| $\gamma$ -resorcylic acid                                           | 7.99                    | 152.8       | 108.9       | -35                    | -3                     | -10                     | -14                     | 0                       |
|                                                                     |                         |             | 65*         | -35                    | -3                     | -10                     | -30                     | 0                       |
| 3-hydroxybenzoic acid                                               | 8.10                    | 136.9       | 93*         | -35                    | -4                     | -16.72                  | -16                     | -2                      |
|                                                                     |                         |             | 75          | -35                    | -4                     | -16.72                  | -48                     | 0                       |
| $\beta$ -resorcylic acid                                            | 8.92                    | 152.8       | 65*         | -35                    | -2                     | -10                     | -24                     | 0                       |
|                                                                     |                         |             | 108.9       | -35                    | -2                     | -10                     | -12                     | 0                       |
| <i>trans</i> -Sinapic acid                                          | 9.23                    | 222.8       | 121*        | -35                    | -8.5                   | -10                     | -36                     | 0                       |
|                                                                     |                         |             | 148.9       | -35                    | -8.5                   | -10                     | -20                     | 0                       |
| <i>cis</i> -Sinapic acid                                            | 9.77                    | 222.8       | 121         | -35                    | -8.5                   | -10                     | -36                     | 0                       |
|                                                                     |                         |             | 148.9       | -35                    | -8.5                   | -10                     | -20                     | 0                       |
| <i>trans-p</i> -Coumaric acid<br>( <i>trans</i> -4-hydroxycinnamic) | 9.33                    | 162.8       | 93          | -30                    | -8                     | -12                     | -44                     | 0                       |
|                                                                     |                         |             | 119*        | -30                    | -8                     | -12                     | -14                     | 0                       |
| <i>trans</i> -Ferulic acid                                          | 9.88                    | 192.8       | 133.9*      | -25                    | -11.5                  | -14                     | -16                     | 0                       |
|                                                                     |                         |             | 177.9       | -25                    | -11.5                  | -14                     | -12                     | -2                      |
| Rosmarinic acid                                                     | 10.23                   | 358.7       | 132.6       | -50                    | -5                     | -26                     | -44                     | 0                       |
|                                                                     |                         |             | 160.8*      | -50                    | -5                     | -26                     | -20                     | -2                      |
| <i>trans</i> -Isoferulic acid                                       | 10.55                   | 192.8       | 133.9*      | -30                    | -9.5                   | -14                     | -16                     | -2                      |
|                                                                     |                         |             | 177.9       | -30                    | -9.5                   | -14                     | -12                     | -2                      |
| <i>m</i> -Coumaric acid<br>( <i>trans</i> -3-Hydroxycinnamic acid)  | 10.69                   | 162.8       | 91          | -35                    | -4.5                   | -12                     | -36                     | 0                       |
|                                                                     |                         |             | 119*        | -35                    | -4.5                   | -12                     | -14                     | 0                       |
| Veratric acid                                                       | 10.82                   | 180.7       | 121.9       | -35                    | -6                     | -14                     | -18                     | 0                       |
|                                                                     |                         |             | 136.9*      | -35                    | -6                     | -14                     | -12                     | 0                       |
| 3,4,5-trimethoxyphenylacetic<br>acid                                | 10.97                   | 224.9       | 166.1*      | -20                    | -3.5                   | -10                     | -12                     | -2                      |
|                                                                     |                         |             | 180.8       | -20                    | -3.5                   | -10                     | -10                     | -2                      |
| <i>o</i> -Coumaric acid<br>( <i>trans</i> -2-Hydroxycinnamic acid)  | 11.87                   | 162.8       | 119*        | -25                    | -5                     | -10                     | -14                     | 0                       |
|                                                                     |                         |             | 93          | -25                    | -5                     | -10                     | -46                     | 0                       |
| 3,4-dimethoxycinnamic acid                                          | 13.18                   | 206.9       | 103.1       | -30                    | -10                    | -16                     | -16                     | 0                       |
|                                                                     |                         |             | 163*        | -30                    | -10                    | -16                     | -12                     | -2                      |
| Salicylic acid                                                      | 14.18                   | 136.9       | 75          | -35                    | -4                     | -10                     | -48                     | 0                       |
|                                                                     |                         |             | 93*         | -35                    | -4                     | -10                     | -16                     | -2                      |

|                           |       |       |                    |     |    |     |     |    |
|---------------------------|-------|-------|--------------------|-----|----|-----|-----|----|
| 3,5-dimethoxybenzoic acid | 14.53 | 180.8 | 136.9 <sup>*</sup> | -35 | -4 | -14 | -12 | -2 |
|                           |       |       | 122                | -35 | -4 | -14 | -20 | 0  |

<sup>a</sup>DP- Declustering Potential; - <sup>b</sup>EP- Entrance Potential; <sup>c</sup>CEP- Cell Entrance Potential;

<sup>d</sup>CE- Collision Energy; <sup>e</sup>CXP- Collision Cell Exit Potential; \*Quantification ion

**Table S2.** The optimized LC-MS parameters for qualitative analysis of flavonoid aglycones.

| Compound                                          | Retention time [min] | Q1 [m/z] | Q3 [m/z] | DP <sup>a</sup> [V] | EP <sup>b</sup> [V] | CEP <sup>c</sup> [V] | CE <sup>d</sup> [eV] | CXP <sup>e</sup> [V] |
|---------------------------------------------------|----------------------|----------|----------|---------------------|---------------------|----------------------|----------------------|----------------------|
| Taxifolin                                         | 5.61                 | 302.7    | 124.9*   | -45                 | -3.5                | -18                  | -26                  | 0                    |
|                                                   |                      |          | 284.8    | -45                 | -3.5                | -18                  | -14                  | -4                   |
| Myricetin                                         | 5.95                 | 316.7    | 136.9*   | -55                 | -9                  | -14                  | -32                  | 0                    |
|                                                   |                      |          | 150.9    | -55                 | -9                  | -14                  | -26                  | 0                    |
| Morin                                             | 6.25                 | 300.7    | 124.9*   | -50                 | -3.5                | -20                  | -24                  | 0                    |
|                                                   |                      |          | 106.9    | -50                 | -3.5                | -20                  | -30                  | 0                    |
| Luteolin                                          | 6.54                 | 284.7    | 132.9*   | -75                 | -9                  | -18                  | -38                  | 0                    |
|                                                   |                      |          | 150.9    | -75                 | -9                  | -18                  | -26                  | 0                    |
| 3- <i>O</i> -Methylquercetin                      | 6.55                 | 314.7    | 299.8*   | -55                 | -9.5                | -22                  | -18                  | -4                   |
|                                                   |                      |          | 270.8    | -55                 | -9.5                | -22                  | -26                  | -4                   |
| Quercetin                                         | 6.67                 | 300.7    | 150.9*   | -60                 | -2.5                | -12                  | -26                  | 0                    |
|                                                   |                      |          | 178.8    | -60                 | -2.5                | -12                  | -20                  | -2                   |
| Eriodictyol                                       | 7.01                 | 286.7    | 134.9*   | -45                 | -6                  | -12                  | -32                  | 0                    |
|                                                   |                      |          | 150.9    | -45                 | -6                  | -12                  | -18                  | -2                   |
| Apigenin                                          | 7.42                 | 268.8    | 117*     | -70                 | -9.5                | -12                  | -44                  | 0                    |
|                                                   |                      |          | 106.8    | -70                 | -9.5                | -12                  | -34                  | 0                    |
| Naringenin                                        | 7.45                 | 270.8    | 119*     | -50                 | -11.5               | -12                  | -34                  | 0                    |
|                                                   |                      |          | 150.9    | -50                 | -11.5               | -12                  | -22                  | 0                    |
| Isokaempferide<br>(3- <i>O</i> -Methylkaempferol) | 7.49                 | 298.8    | 283.9*   | -50                 | -4.5                | -12                  | -18                  | -4                   |
|                                                   |                      |          | 226.9    | -50                 | -4.5                | -12                  | -28                  | -2                   |
| Kaempferol                                        | 7.62                 | 284.7    | 116.8*   | -70                 | -5                  | -12                  | -46                  | 0                    |
|                                                   |                      |          | 93       | -70                 | -5                  | -12                  | -52                  | 0                    |
| Isorhamnetin                                      | 7.7                  | 314.7    | 299.7    | -65                 | -2.5                | -26                  | -20                  | -4                   |
|                                                   |                      |          | 150.9*   | -65                 | -2.5                | -26                  | -30                  | 0                    |
| Rhamnetin                                         | 8.7                  | 314.7    | 165*     | -60                 | -5.5                | -18                  | -24                  | 0                    |
|                                                   |                      |          | 120.9    | -60                 | -5.5                | -18                  | -36                  | 0                    |
| Chrysin                                           | 9.81                 | 252.8    | 208.9*   | -80                 | -10                 | -14                  | -22                  | -2                   |
|                                                   |                      |          | 142.9    | -80                 | -10                 | -14                  | -26                  | 0                    |
| Sakuranetin                                       | 9.9                  | 284.7    | 118.9*   | -60                 | -5.5                | -12                  | -34                  | 0                    |
|                                                   |                      |          | 164.8    | -60                 | -5.5                | -12                  | -20                  | -2                   |
| Prunetin                                          | 10.05                | 282.8    | 267.7    | -55                 | -12                 | -18                  | -20                  | -4                   |
|                                                   |                      |          | 238.7*   | -55                 | -12                 | -18                  | -26                  | -2                   |
| Rhamnazin                                         | 10.45                | 328.7    | 270.8*   | -70                 | -3                  | -28                  | -26                  | -2                   |
|                                                   |                      |          | 313.8    | -70                 | -3                  | -28                  | -14                  | -4                   |

<sup>a</sup>DP- Declustering Potential; - <sup>b</sup>EP- Entrance Potential; <sup>c</sup>CEP- Cell Entrance Potential;<sup>d</sup>CE- Collision Energy; <sup>e</sup>CXP- Collision Cell Exit Potential; \*Quantification ion

**Figure S1.** LC-MS/MS-MRM chromatogram of phenolic acids standards sharing the same MRM transitions;  $m/z$  166.8  $\rightarrow$  107.9 - homogentisic and vanilic acid;  $m/z$  152.8  $\rightarrow$  109 – resorcylic acids;  $m/z$  136.8  $\rightarrow$  93 – hydroxybenzoic acids;  $m/z$  162.8  $\rightarrow$  119 – coumaric acids;  $m/z$  192.8  $\rightarrow$  133.9 – ferulic and isoferulic acid;  $m/z$  180.7  $\rightarrow$  136.9 – veratric and 3,5-dimethoxybenzoic acid. Rt values as given in Table S1.

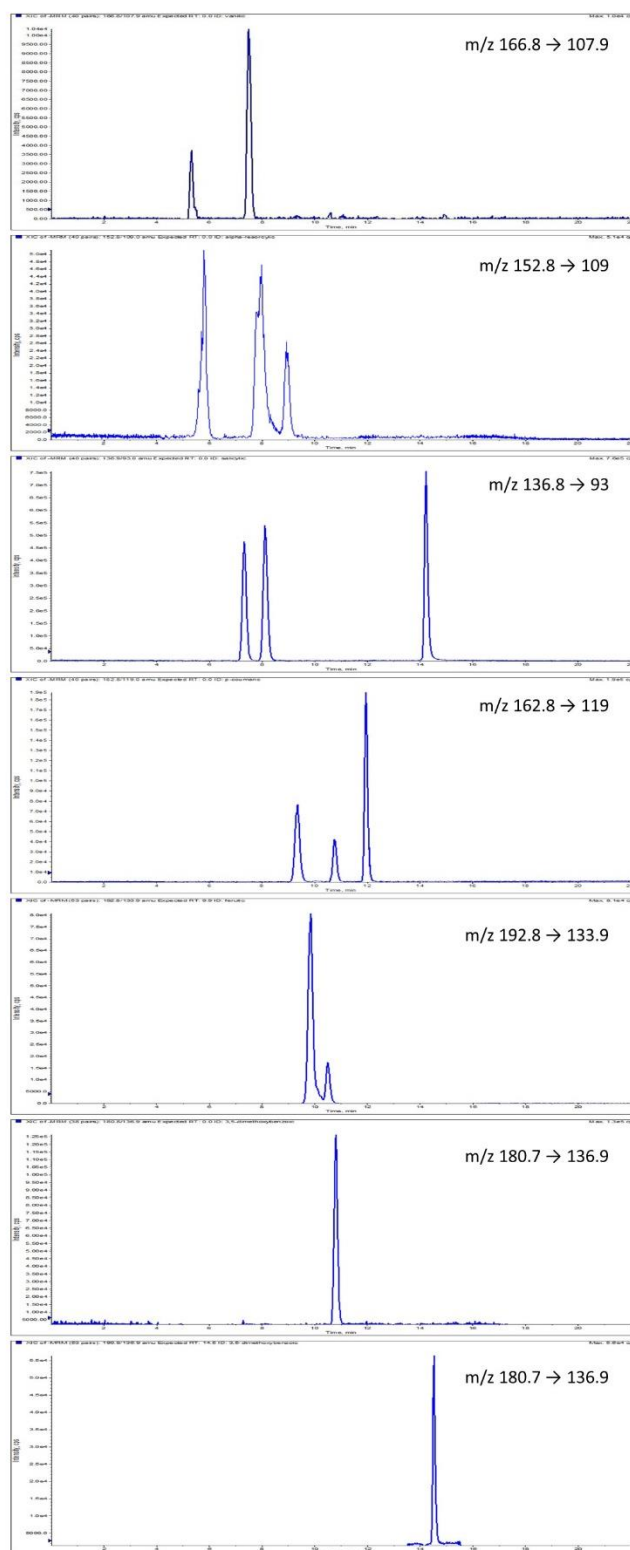

**Figure S2.** An exemplary LC-MS/MS-MRM chromatogram of bound phenolic acids found in *R. rugosa* true fruits (achenes).

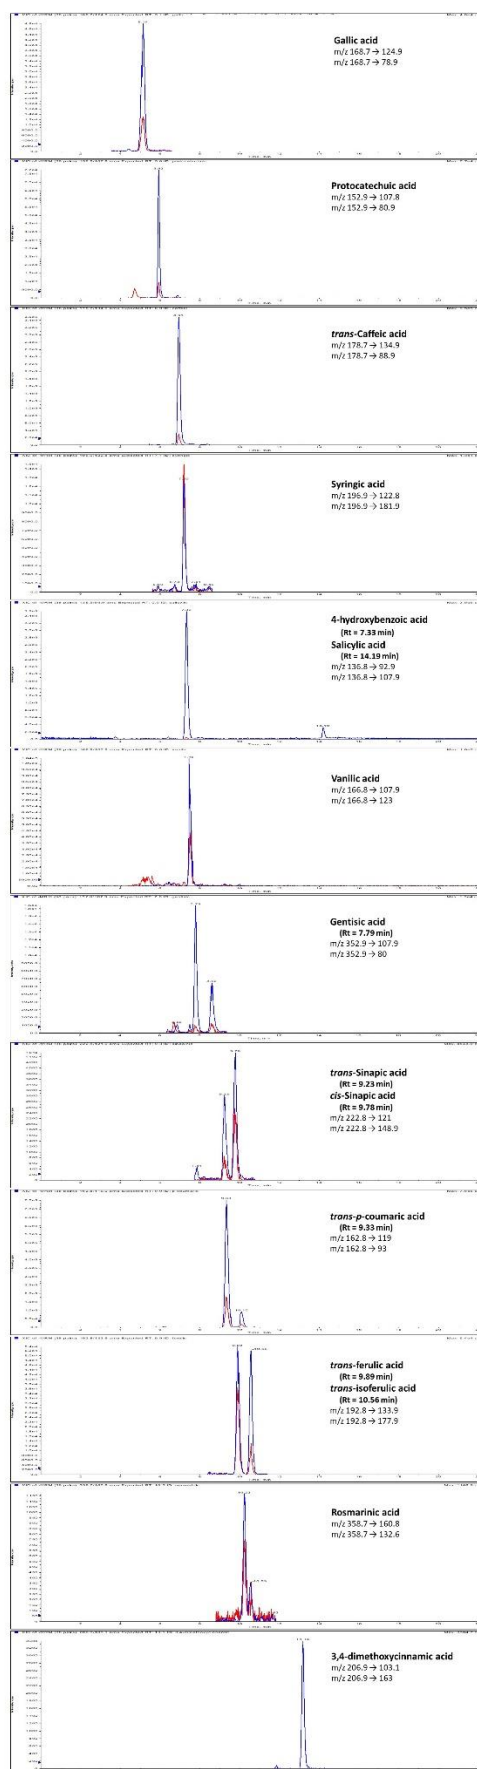

**Figure S3.** MRM chromatograms showing the effect of endogenous sample components that interfere with the ionization of ferulic acid (blue) and syringic acid (red).

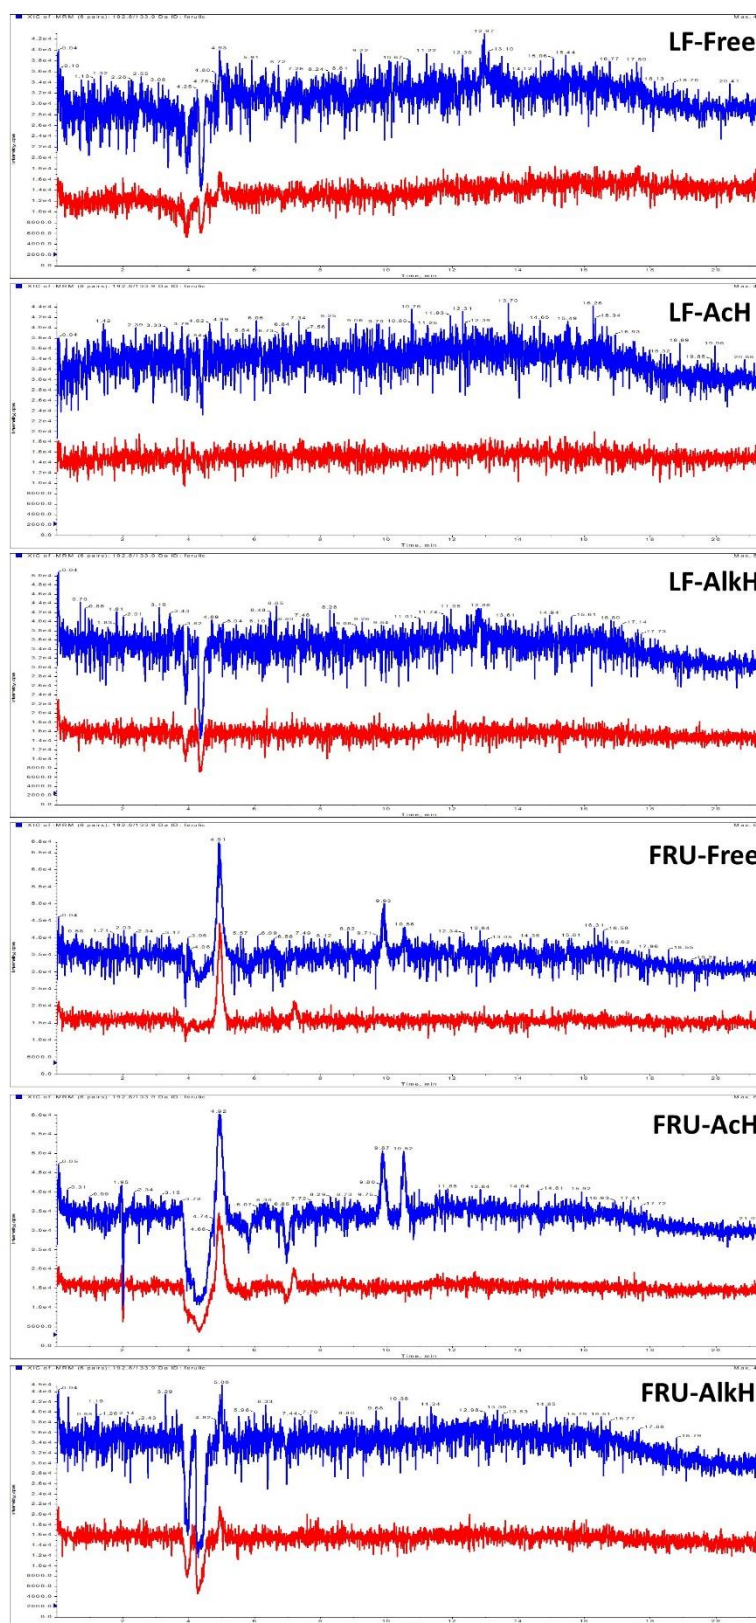

**Figure S4.** MRM chromatograms showing the effect of endogenous sample components that interfere with the ionization of myricetin.

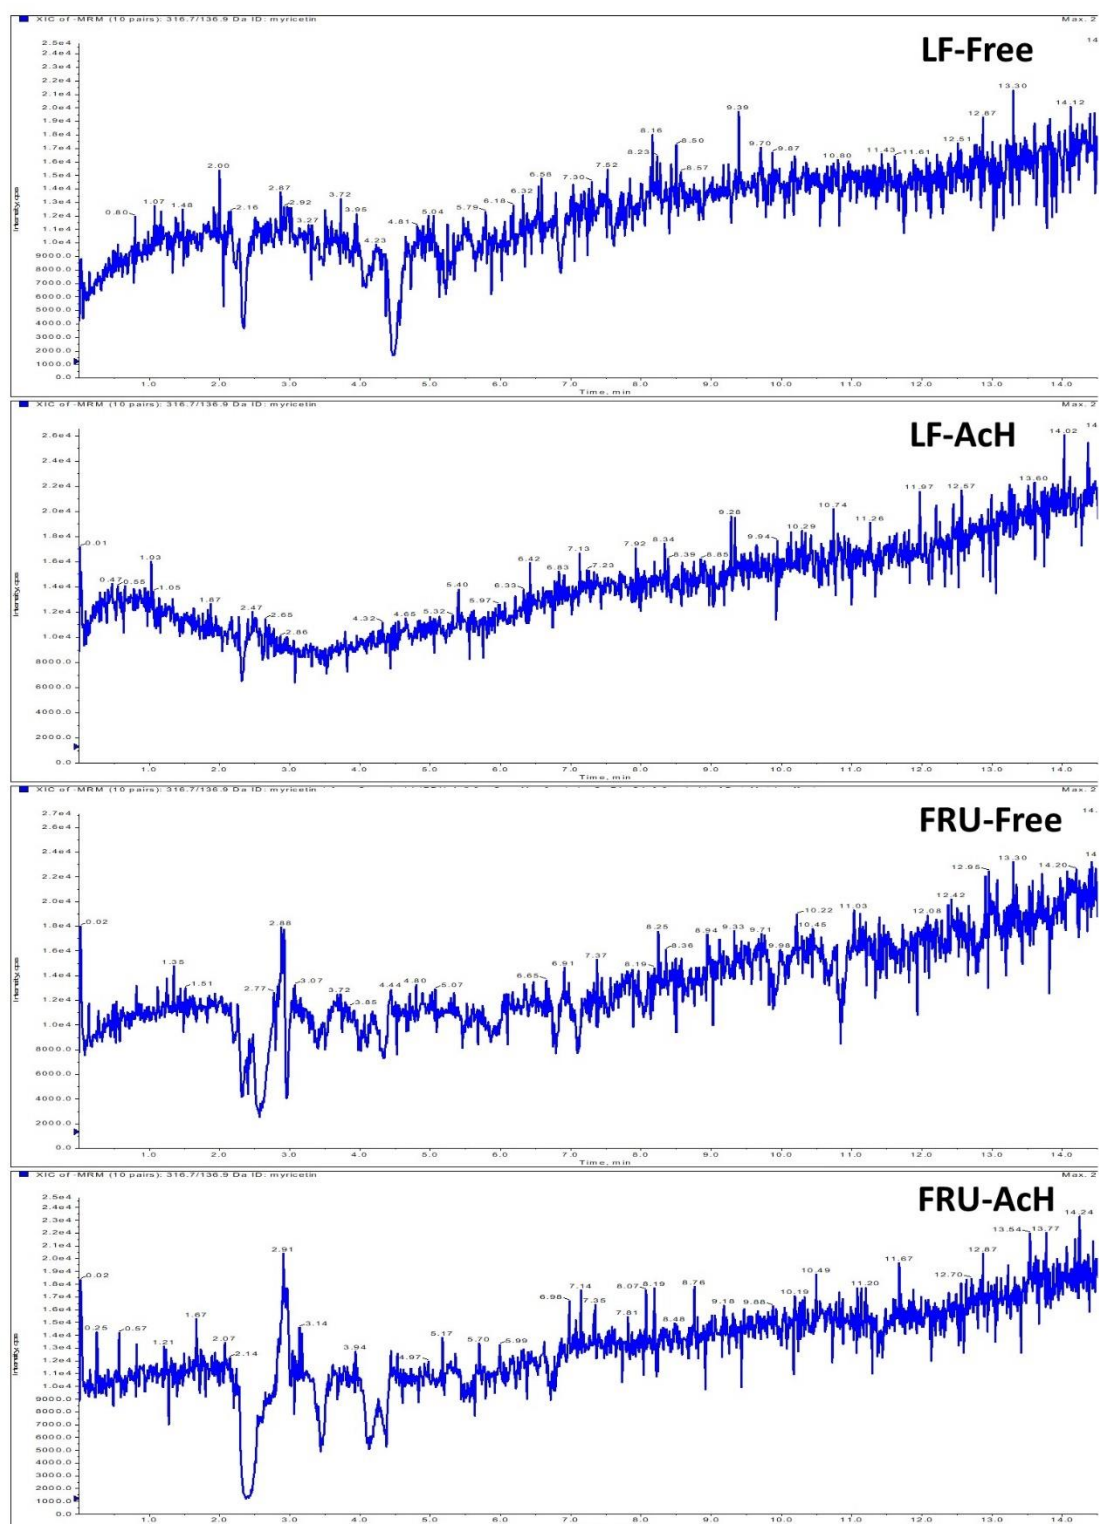

Supplement: s1 [file s1]
