# Supplementary figures and images for: Characterization of Free and Bound Phenolic Acids and Flavonoid Aglycones in Rosa rugosa Thunb. Leaves and Achenes Using LC–ESI–MS/MS–MRM Methods
Source: MDPI journal article supplement (doi:10.3390/molecules25081804), 2020-04-15

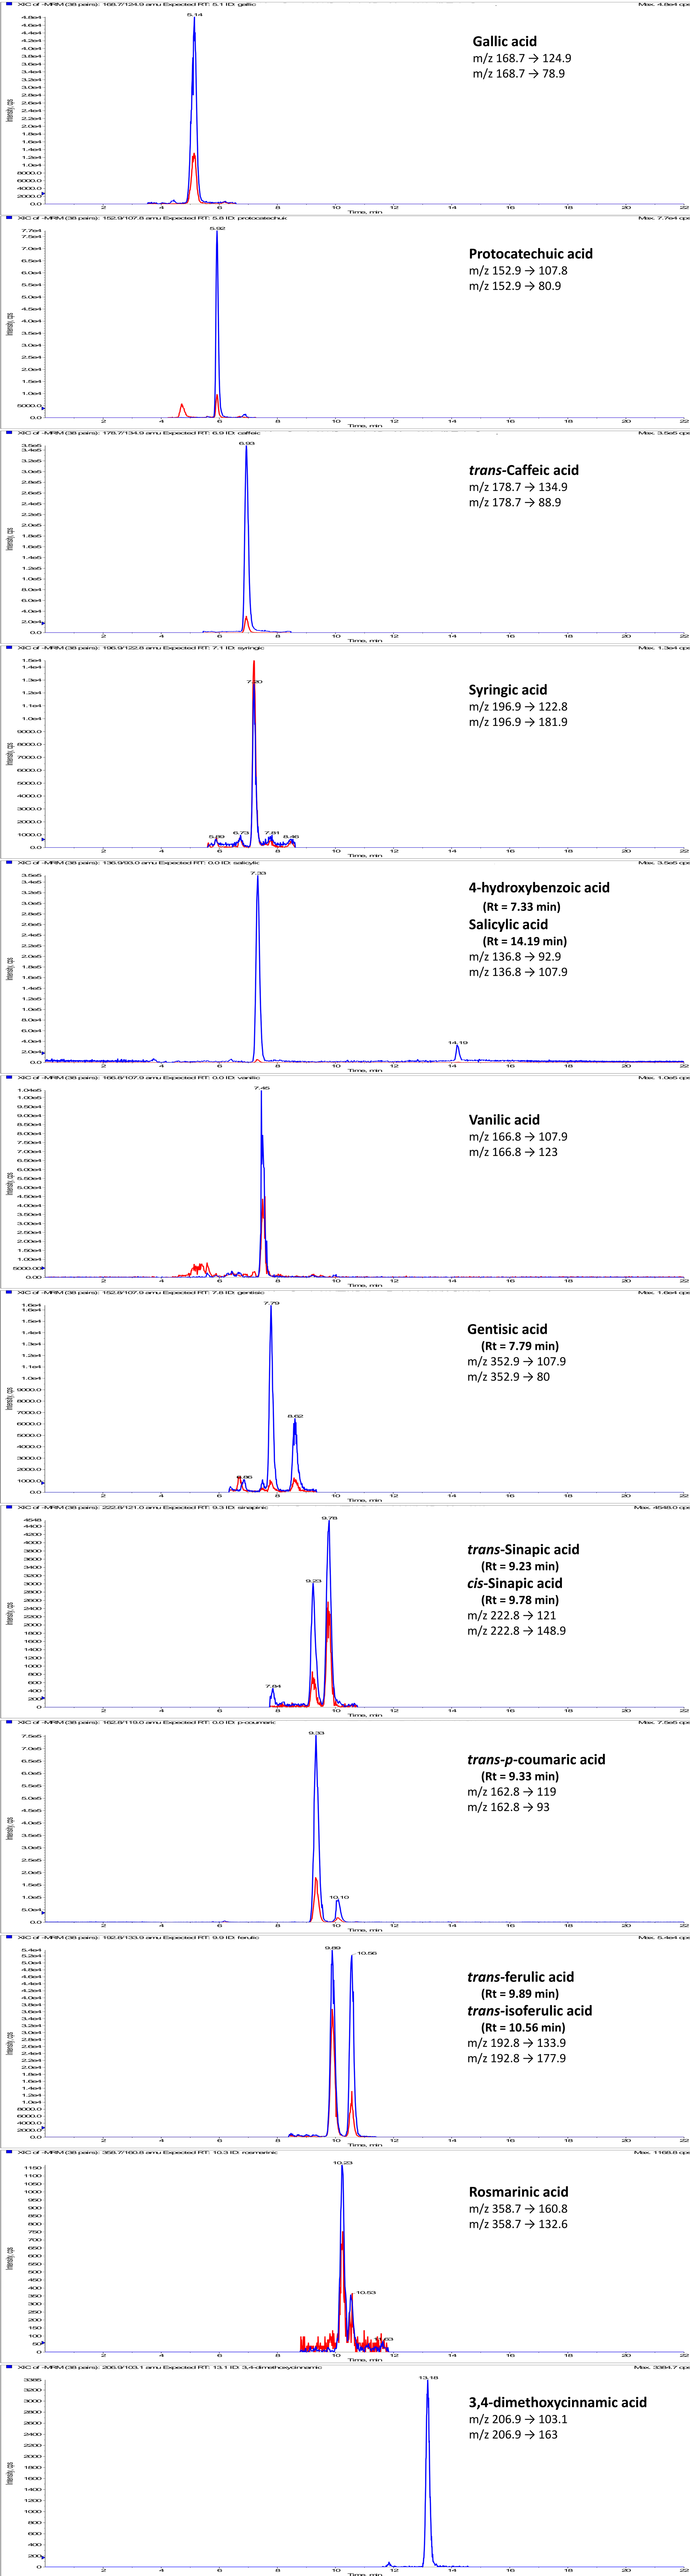

Supplement: s1 [file s1]

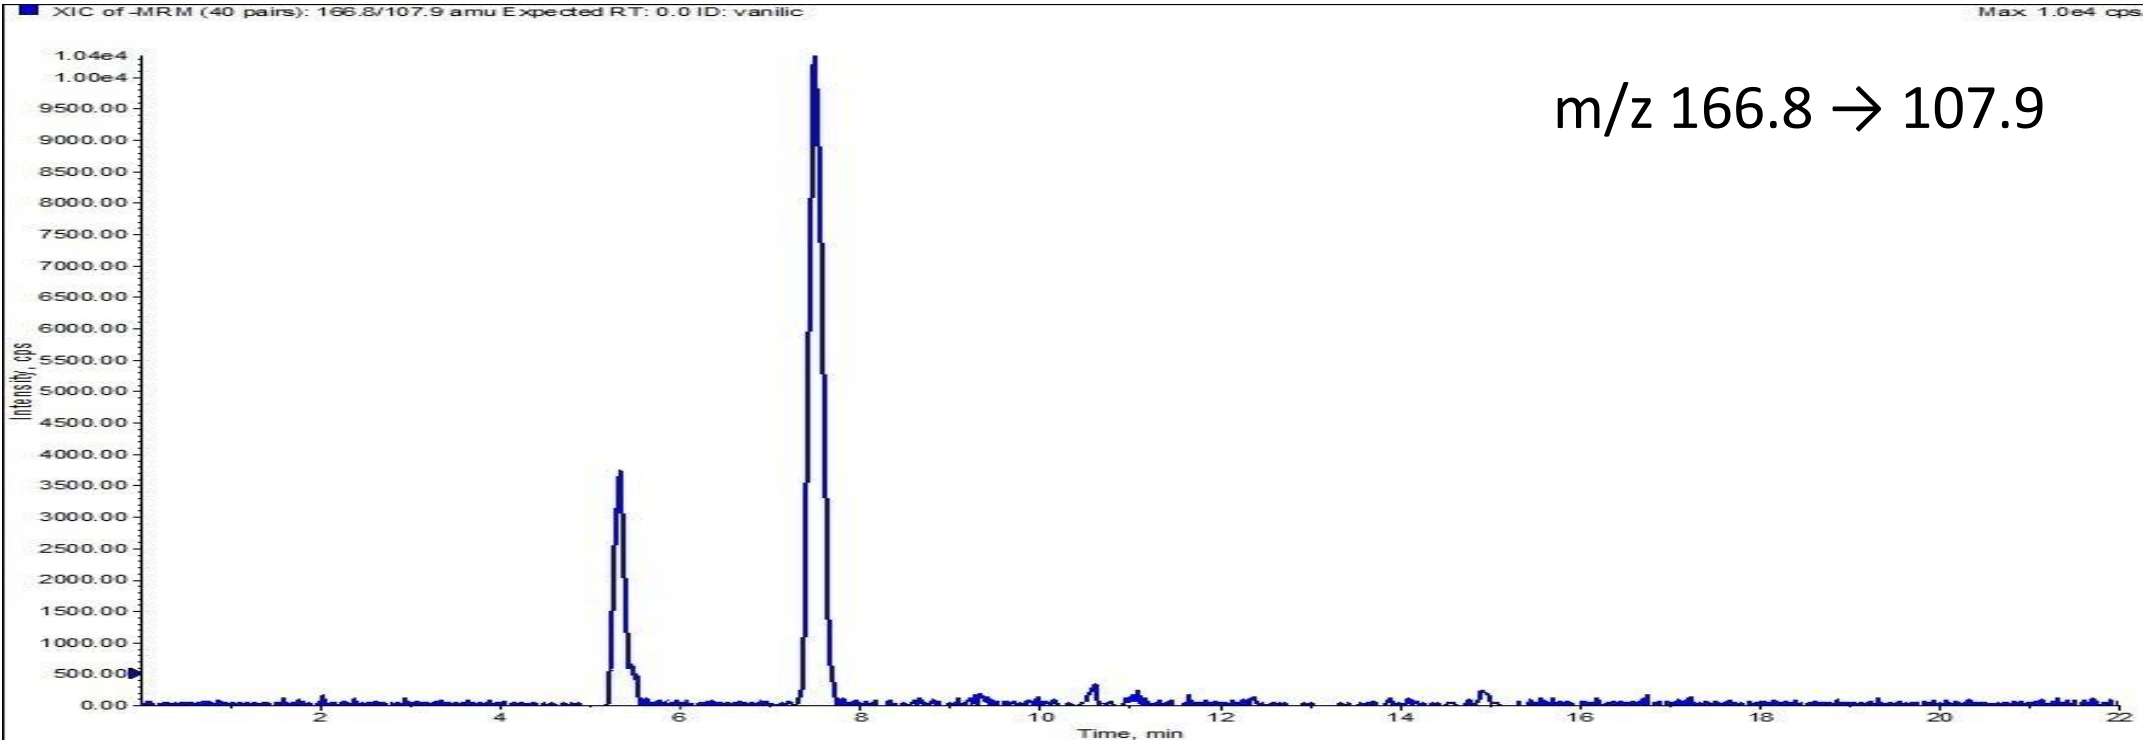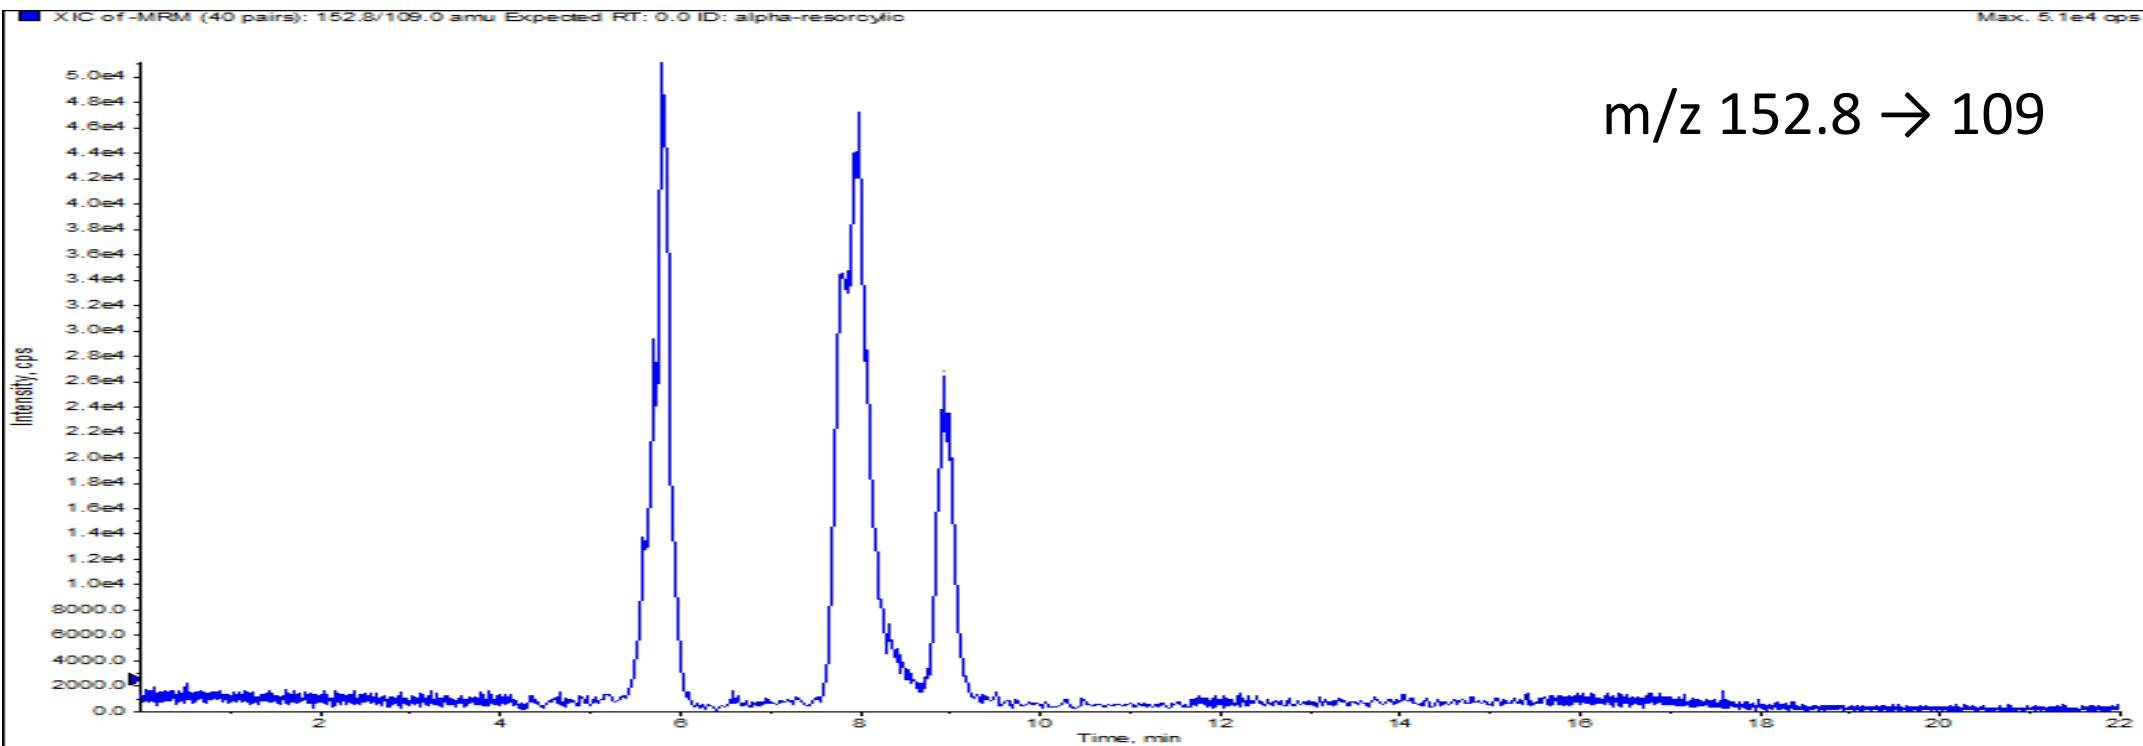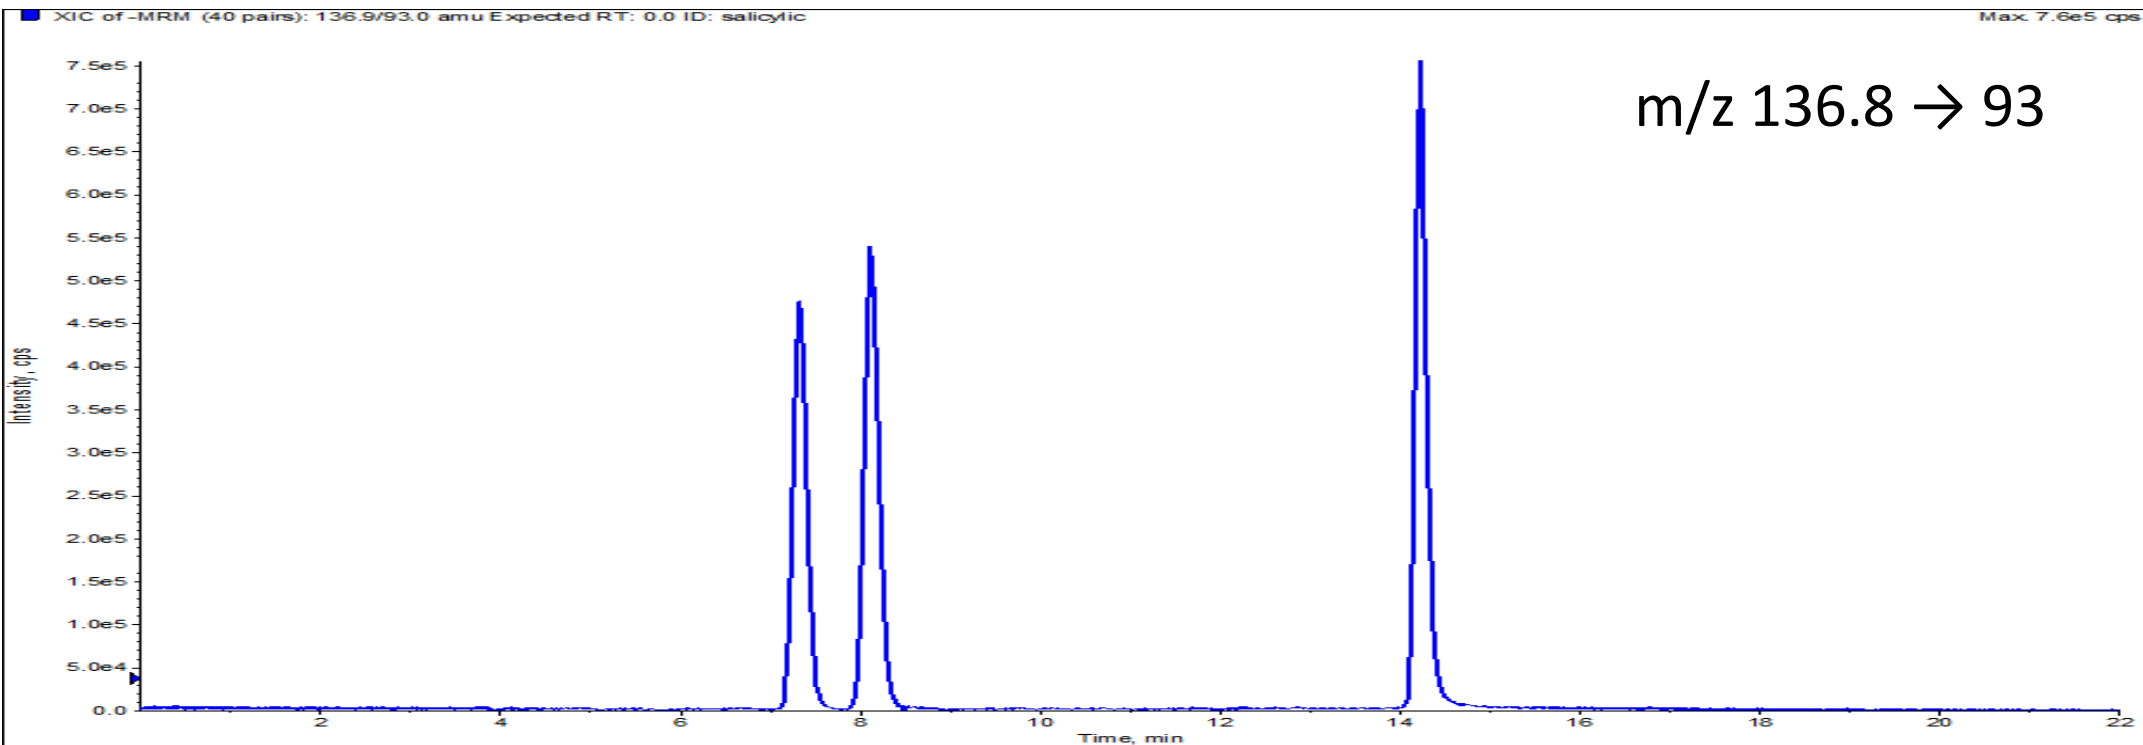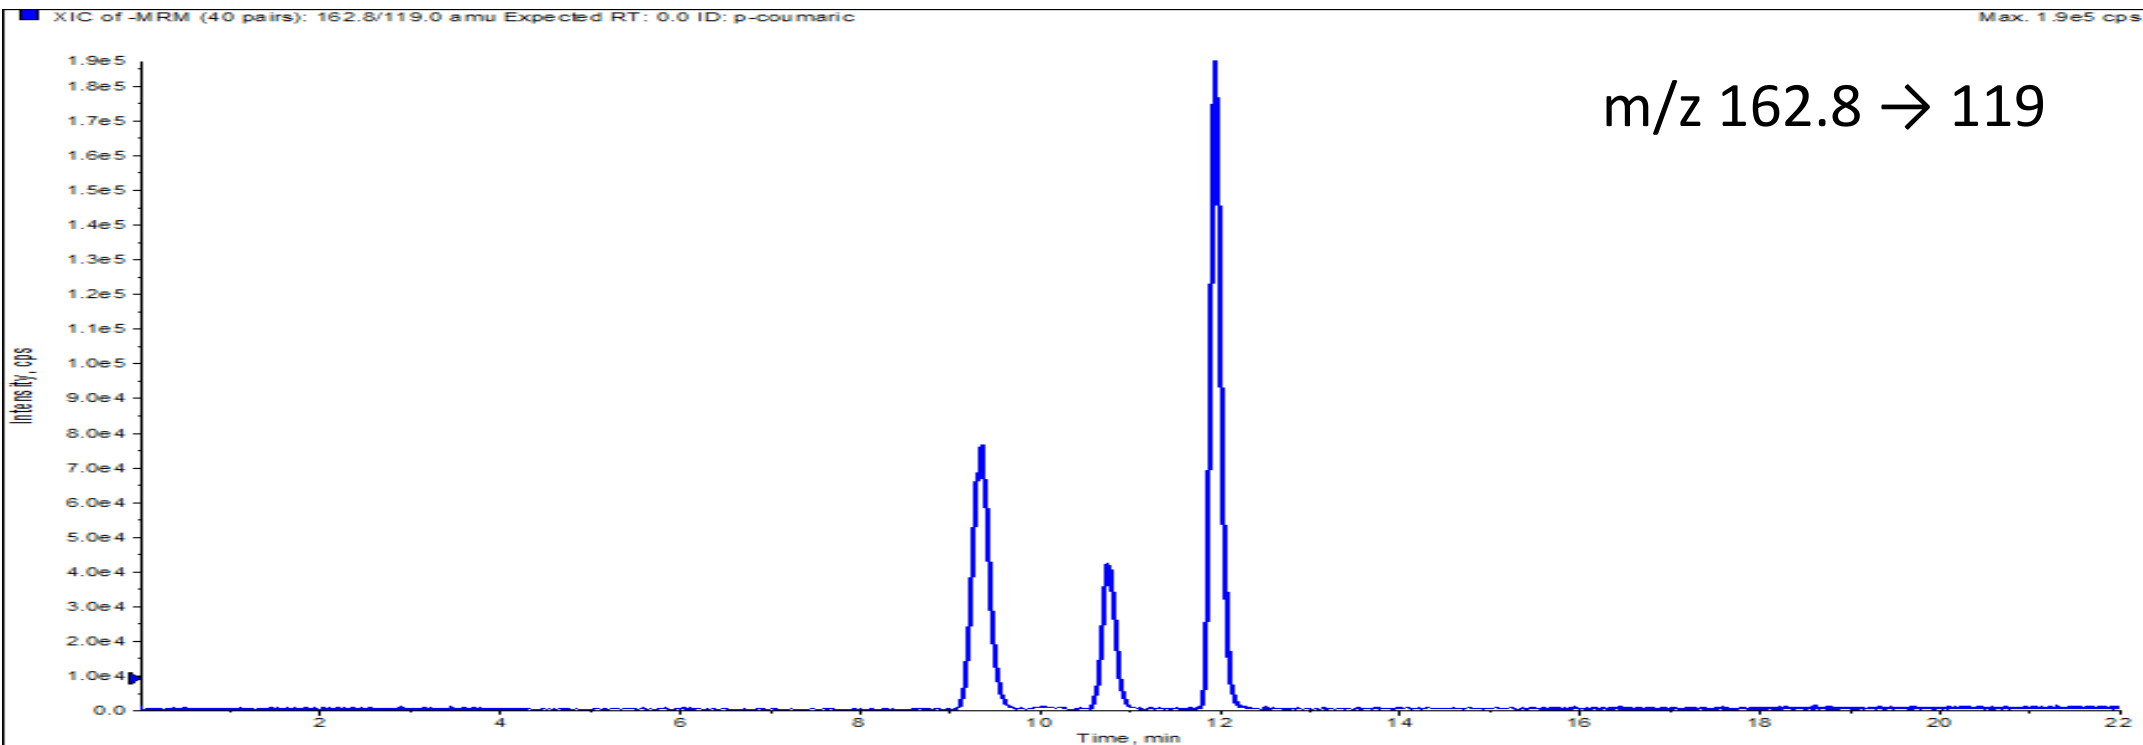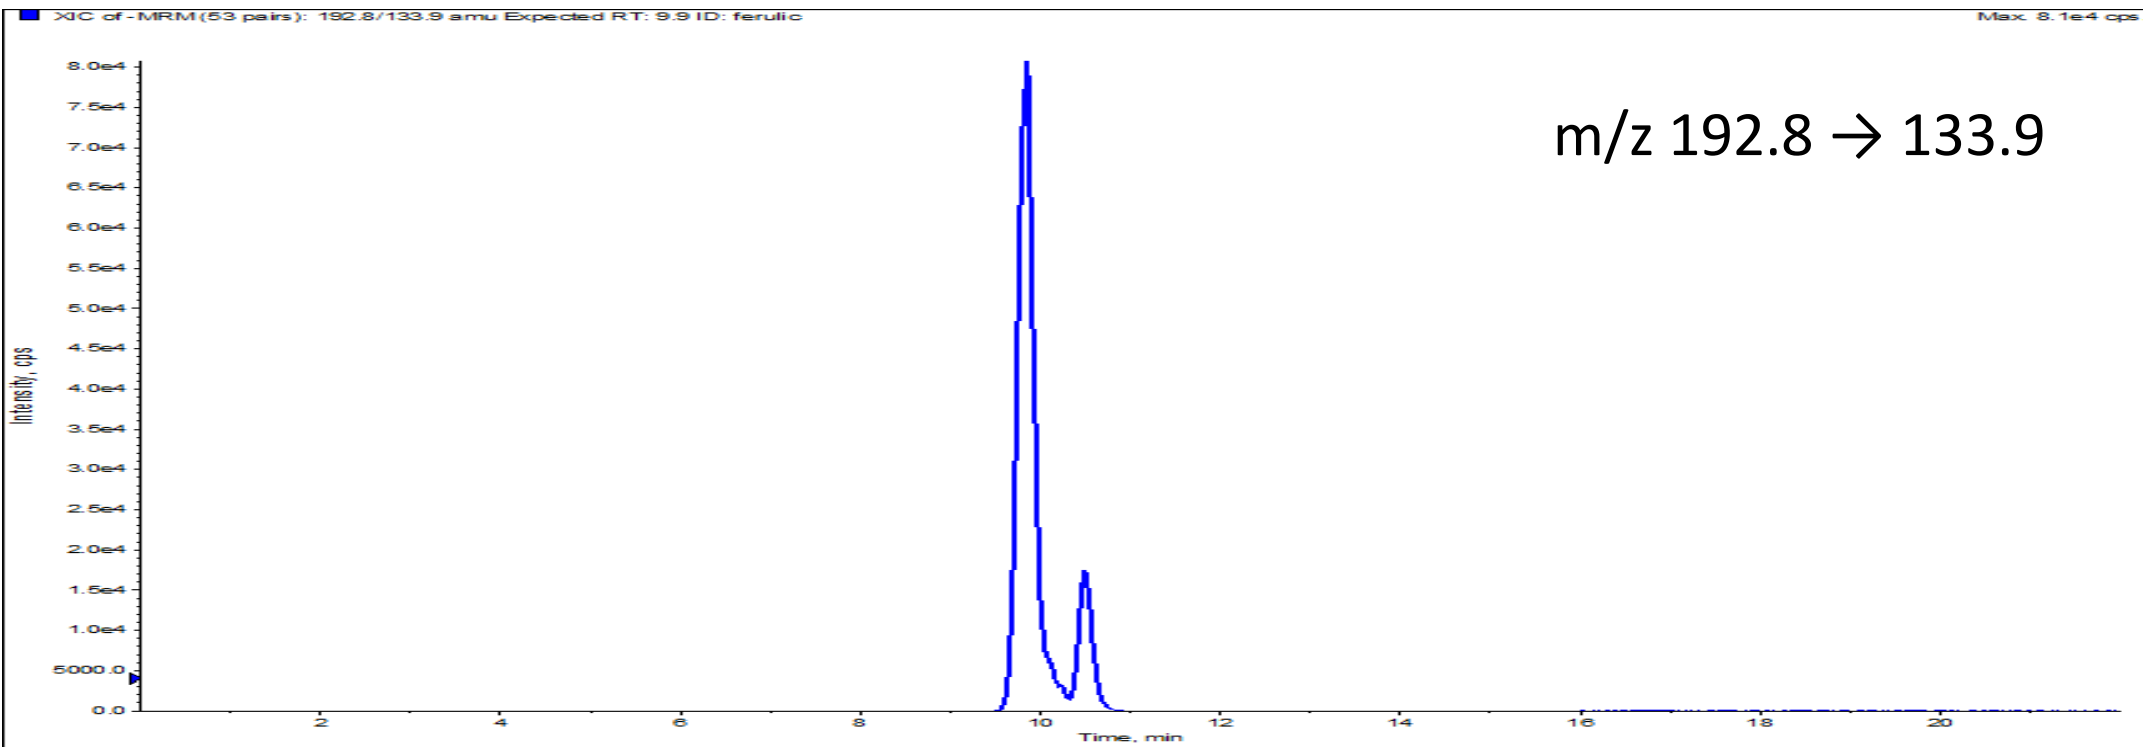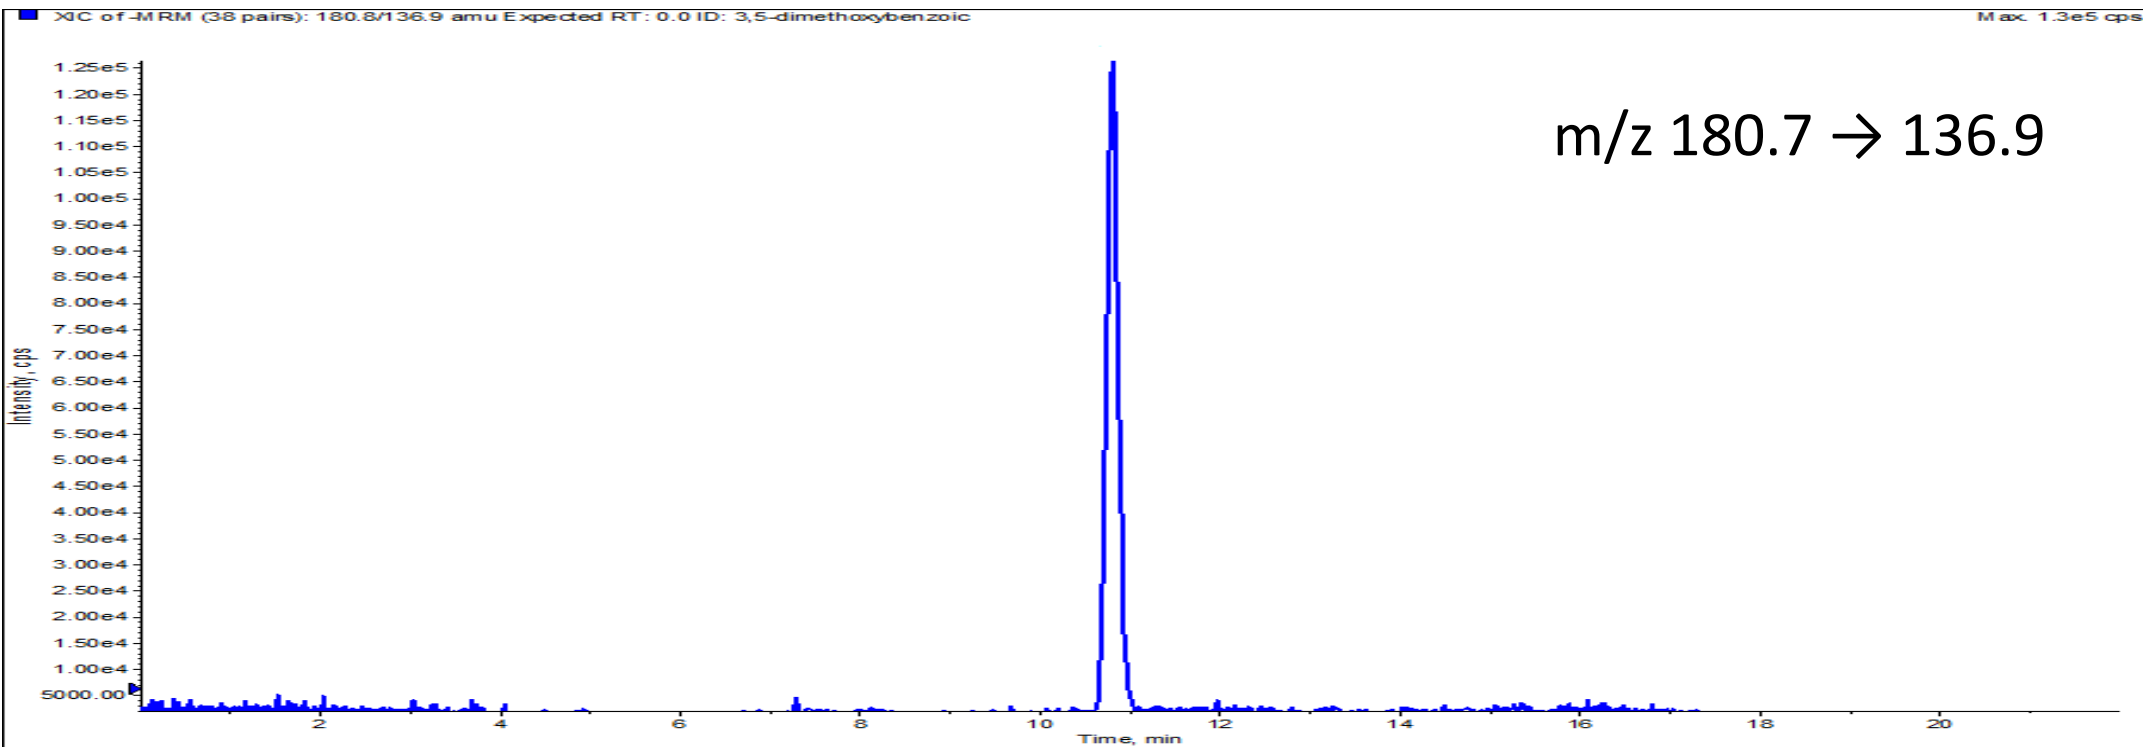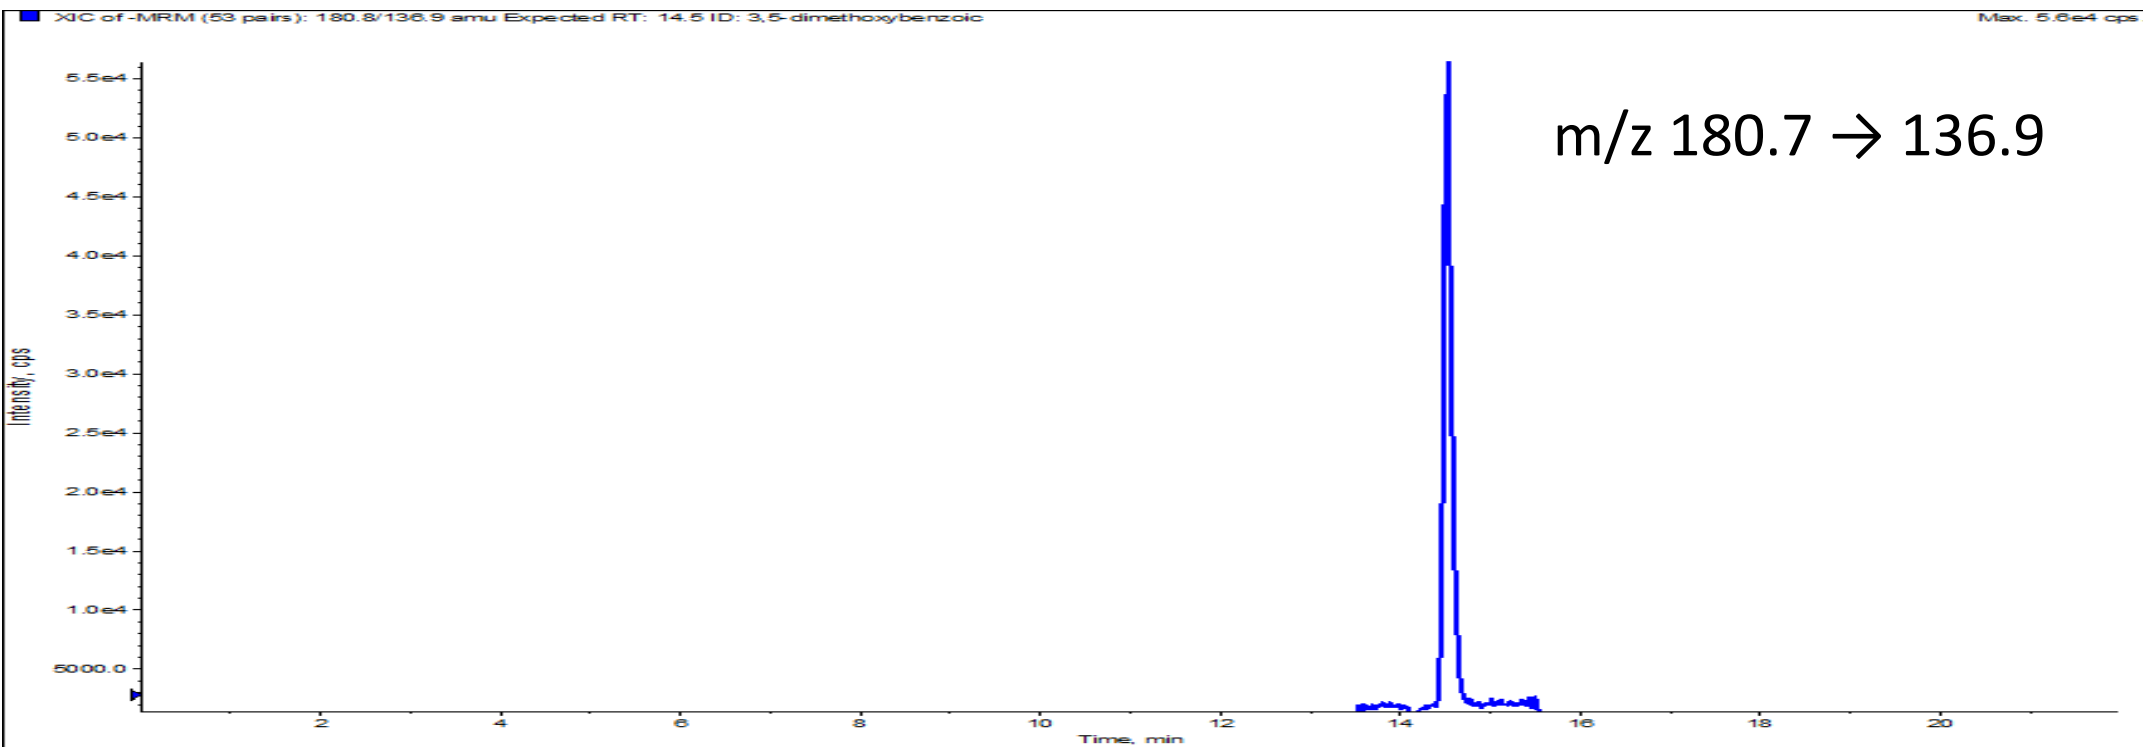

Supplement: s1 [file s1]
